Table S1. Total magnetic field intensity and inclination differences with the home loft for the release sites used in this experiment and in Beason et al. (Beason et al., 1997) sorted in ascending order of intensity difference

| Site (distance from loft)    | Total field intensity difference from home loft (nT) | Inclination difference from home (deg) |
|------------------------------|------------------------------------------------------|----------------------------------------|
| la Sterza (39 km)            | 24                                                   | 0.1366                                 |
| Budesheim (17.2 km)          | 26                                                   | 0.0641                                 |
| Bickenbach (81.5 km) 12/9/90 | 45                                                   | 0.036                                  |
| Bickenbach (81.5 km) 26/6/92 | 46                                                   | 0.0381                                 |
| Keidrich (42.4 km)           | 50                                                   | 0.0974                                 |
| Montespertoli (61 km)        | 51                                                   | 0.0529                                 |
| Chiesina Uzzanese (40.3 km)  | 86                                                   | 0.2073                                 |
| Sterbritz (70.6 km)          | 94                                                   | 0.1922                                 |
| Lich (40.6 km)               | 102                                                  | 0.2926                                 |
| Gernsheim (42 km)            | 108                                                  | 0.3095                                 |
| Fulda-Sickels (82.3 km)      | 154                                                  | 0.3741                                 |
| Erlangen (168 km)**          | 174                                                  | 0.3875                                 |
| Braccagni (106.3 km) 10/8/10 | 216                                                  | 0.7794                                 |
| Braccagni (106.3 km) 1/8/11  | 216                                                  | 0.7786                                 |
| Mutterstadt (79 km)          | 215                                                  | 0.6127                                 |
| Hohenheim (90 km)            | 232                                                  | 0.6613                                 |
| Heringen (129 km)            | 237                                                  | 0.6458                                 |
| Elsenz (107 km) 7/8/90*      | 251                                                  | 0.7702                                 |
| Elsenz (107 km) 29/8/90      | 251                                                  | 0.7702                                 |
| Elsenz (107 km) 17/8/89*     | 274                                                  | 0.7705                                 |
| Hilgeshausen (123 km)        | 294                                                  | 0.7975                                 |

Release sites were calculated from table 1 in Beason et al. (Beason et al., 1997). Intensity values were obtained from <http://www.ngdc.noaa.gov/geomag-web/#igrfwmm> using the IGRF11 model, which allows the calculation of the field strength and inclination for the precise date of the release.

\*Significant deflecting effect of pulse treatment for south anterior birds.

\*\*Significant difference in scatter for south anterior birds.
